# Supplementary material for: Dual-emitting nanocomposites derived from rare-earth compound nanotubes for ratiometric fluorescence sensing applications
Source: Royal Society of Chemistry journal article supplement (doi:10.1039/c2nr33217e), 2012-12-18
Supplement: c2nr33217e.pdf [file c2nr33217e.pdf]

## Supporting Information for (Dual-Emitting Nanocomposites Derived from Rare-Earth Compound Nanotubes for Ratiometric Fluorescence Sensing Applications)

Tian-Ying Sun,<sup>a</sup> Da-Quan Zhang,<sup>a</sup> Xue-Feng Yu,<sup>a,b\*</sup> Yang Xiang,<sup>a</sup> Min Luo,<sup>a</sup> Jia-Hong Wang,<sup>a</sup> Guo-Long Tan,<sup>c</sup>  
Qu-Quan Wang,<sup>a</sup> Paul K. Chu<sup>b\*</sup>

[\*] <sup>a</sup> Department of Physics, Key Laboratory of Artificial Micro- and Nano-structures of Ministry  
of Education, Wuhan University, Wuhan, 430072, P. R. China

<sup>b</sup> Department of Physics and Materials Science, City University of Hong Kong, Tat Chee Avenue,  
Kowloon, Hong Kong, China

<sup>c</sup> Institute of New Materials, Wuhan University of Technology, Wuhan 430070, P. R. China

[\*\*] T.-Y. Sun and D.-Q. Zhang contributed equally to this work.

\*Address correspondence to yxf@whu.edu.cn (X.-F. Yu); paul.chu@cityu.edu.hk (P.K. Chu).

### 1. Empirical Formula of YHF:Ce NTs.

The empirical formula of the  $(Y_{0.69}Ce_{0.31})(OH)_{1.682}F_{1.318}$  (YHF:Ce) NTs was investigated by using TG and EA measurements (see Figure S1). The TGA were taken or monitored continuously in a thermal process from 20 °C to 1000 °C with a heating rate of 10 °C min<sup>-1</sup> in a flow of N<sub>2</sub>. The TG curve obviously indicated that there was no mass loss below 150 °C, corresponding to the inexistence of the bound water. And two weight losses characteristic of the compounds have been observed. The YHF:Ce NTs lost H<sub>2</sub>O in the first stage (300 °C–505 °C) to form oxyfluorides. The subsequent weight loss in the temperature range of 700 °C–1000 °C resulted from the decomposition to Y<sub>2</sub>O<sub>3</sub>. The EA results of the YHF:31%Ce NTs are shown in Figure S1b. The founded element percentages of Y, Ce, F, H, O corresponded well with the calculated element percentages for  $(Y_{0.69}Ce_{0.31})(OH)_{1.682}F_{1.318}$  NTs. The TGA and EA results demonstrated that the empirical formula of the YHF:31%Ce NTs could be estimated to be  $(Y_{0.69}Ce_{0.31})(OH)_{1.682}F_{1.318}$ .

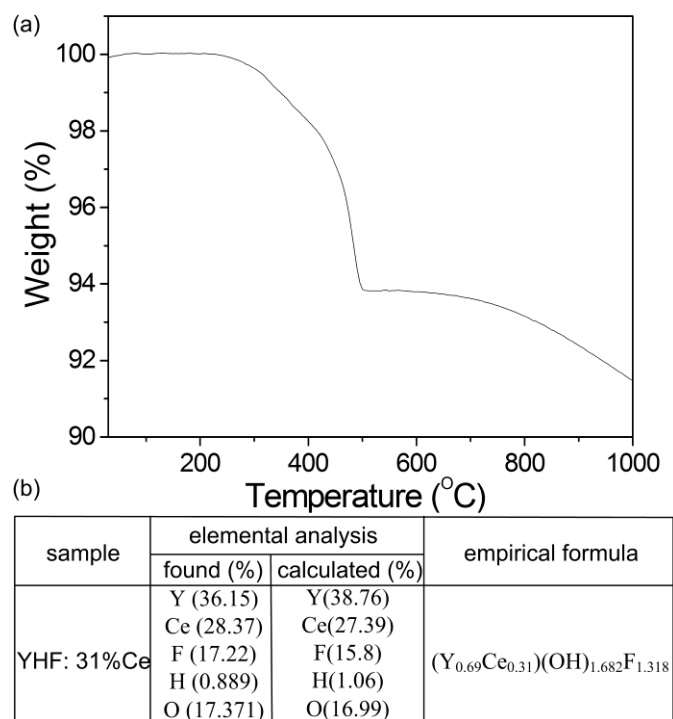

Figure S1. (a) TG curve of YHF: 31%Ce NTs and (b) EA results of YHF: 31%Ce NTs.

## 2. Europium-doped yttrium hydroxide fluoride NTs (YHF:Eu NTs).

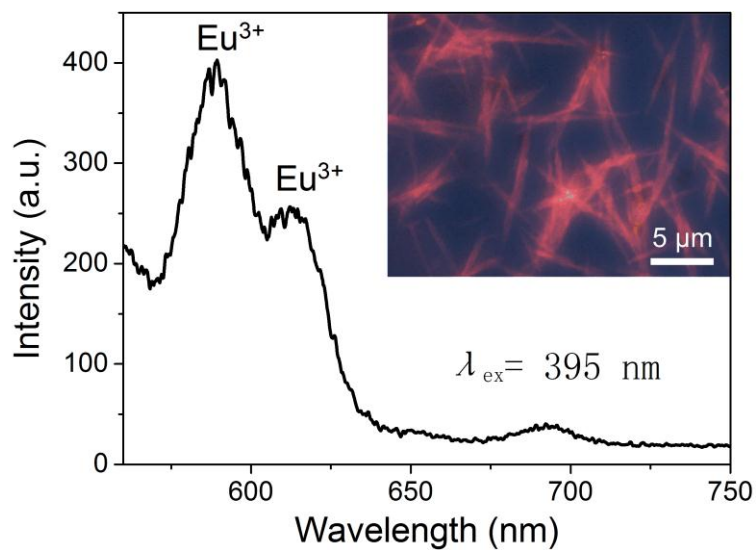

Figure S2. Emission spectra ( $\lambda_{ex} = 395$  nm) of YHF:Eu NTs. Inset image shows the microscopy fluorescence images of YHF:Eu NTs.
